# Supplementary material for: Beyond classification: gene-family phylogenies from shotgun metagenomic reads enable accurate community analysis
Source: PubMed Central journal article supplement (PMC3701559; doi:10.1186/1471-2164-14-419), 2013-06-22

**16S**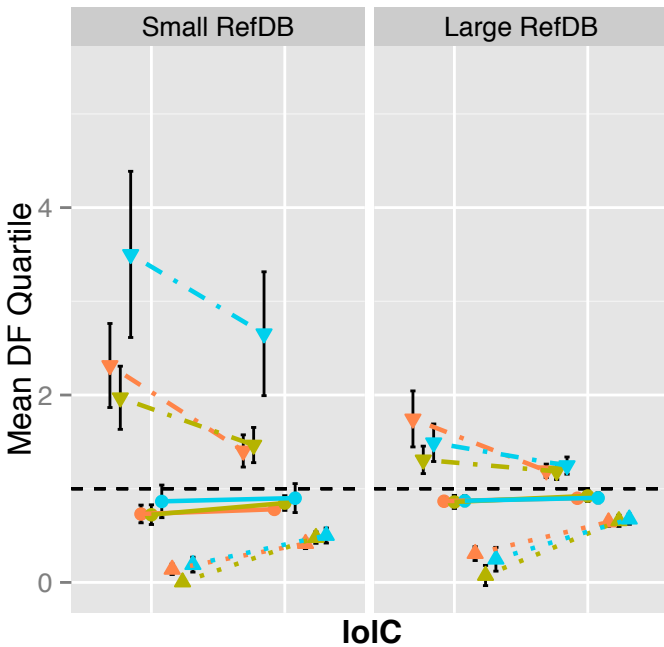**dnaG**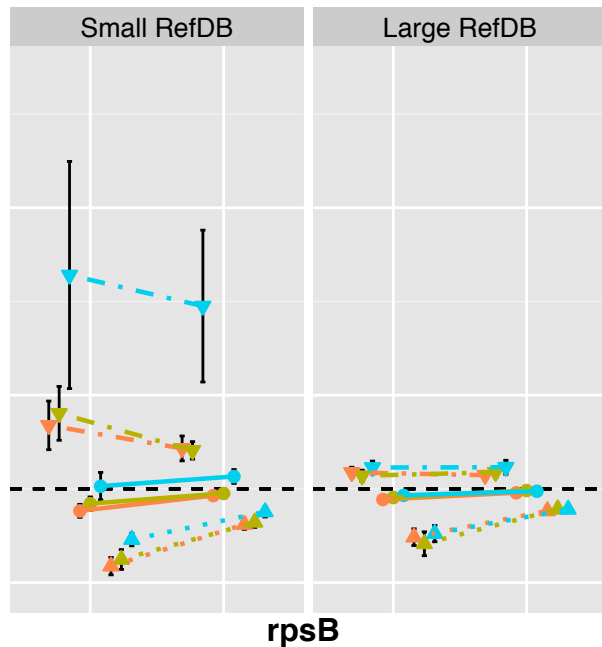**lolC**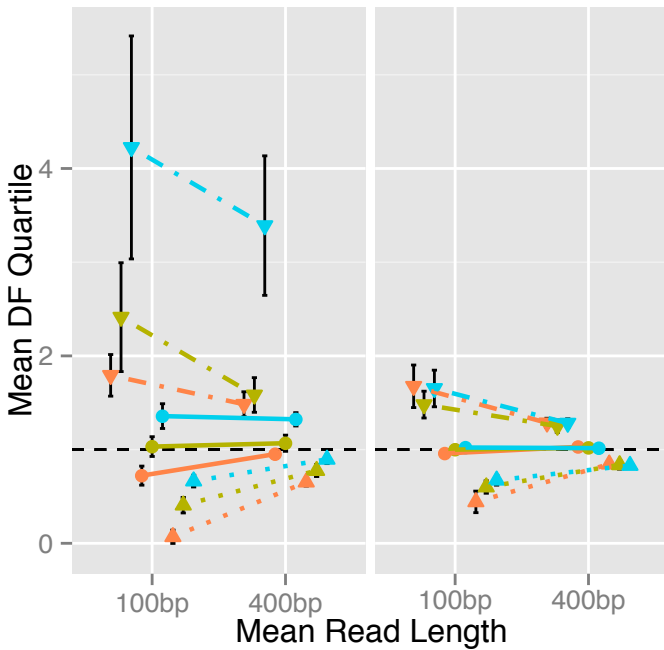**rpsB**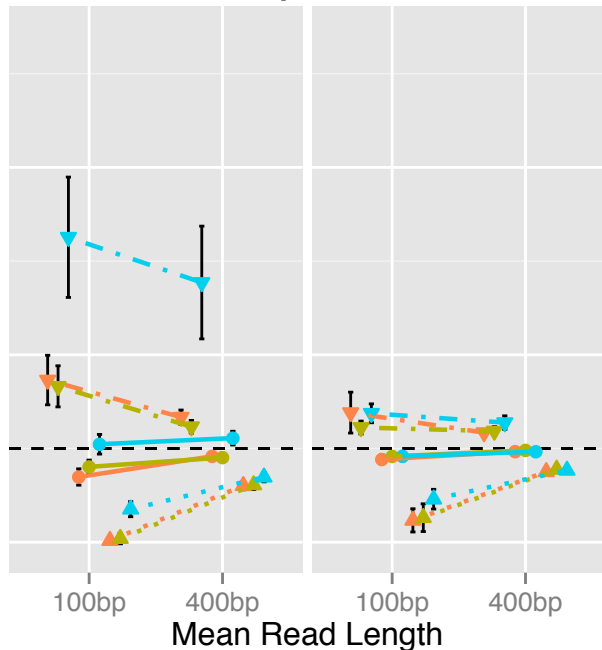

Supplement: 1471-2164-14-419-S3.pdf [file 1471-2164-14-419-S3.pdf]
